# Supplementary material for: Lymphadenectomy Benefits Small Cell Carcinoma of Ovary: A Population-Based Analysis
Source: MDPI journal article supplement (doi:10.3390/curroncol29100617), 2022-10-16
Supplement: s1 [file curroncol-1900381-supplementary.pdf › curroncol-1900381-supplementary.pdf]

**Supplementary Table S1.** Baseline demographic, clinicopathologic and therapeutic characteristics for SCCO. 1  
2

|                          | <b>Small<br/>(N=126)</b> |
|--------------------------|--------------------------|
| <b>Marital status</b>    |                          |
| Married and other        | 73 (57.9%)               |
| Single                   | 50 (39.7%)               |
| Unknown                  | 3 (2.4%)                 |
| <b>Race</b>              |                          |
| Black                    | 10 (7.9%)                |
| Other                    | 14 (11.1%)               |
| Unknown                  | 1 (0.8%)                 |
| White                    | 101 (80.2%)              |
| <b>Malignance</b>        |                          |
| ≥2                       | 17 (13.5%)               |
| 1                        | 109 (86.5%)              |
| <b>Grade</b>             |                          |
| I                        | 0 (0%)                   |
| II                       | 1 (0.8%)                 |
| III                      | 25 (19.8%)               |
| IV                       | 48 (38.1%)               |
| Other                    | 0 (0%)                   |
| Unknown                  | 52 (41.3%)               |
| <b>Laterality</b>        |                          |
| Bilateral                | 29 (23.0%)               |
| Unilateral               | 97 (77.0%)               |
| <b>Age</b>               |                          |
| Mean (SD)                | 43.0 (21.4)              |
| Median [Min, Max]        | 38.0 [10.0, 91.0]        |
| <b>Year of diagnosis</b> |                          |
| 1975-1987                | 8 (6.3%)                 |
| 1988-1997                | 30 (23.8%)               |
| 1998-2007                | 42 (33.3%)               |
| 2008-2018                | 46 (36.5%)               |
| <b>size</b>              |                          |
| >15cm                    | 28 (22.2%)               |
| 10-15cm                  | 22 (17.5%)               |
| 5-10cm                   | 13 (10.3%)               |
| 0-5cm                    | 6 (4.8%)                 |
| No/Micro                 | 0 (0%)                   |
| Unknown                  | 57 (45.2%)               |
| <b>FIGO</b>              |                          |
| I                        | 28 (22.2%)               |
| II                       | 11 (8.7%)                |

|                     |             |
|---------------------|-------------|
| III                 | 29 (23.0%)  |
| IV                  | 38 (30.2%)  |
| Unknown/other       | 20 (15.9%)  |
| <b>Radiation</b>    |             |
| No                  | 117 (92.9%) |
| Yes                 | 9 (7.1%)    |
| <b>Chemotherapy</b> |             |
| No/Unknown          | 32 (25.4%)  |
| Yes                 | 94 (74.6%)  |
| <b>Surgery</b>      |             |
| No                  | 23 (18.3%)  |
| Yes                 | 102 (81.0%) |
| Unknown/other       | 1 (0.8%)    |

No/Micro: no mass; no tumor found/microscopic focus or foci only

**Supplementary Table S2.** Cox regression models for overall survival among 126 cases of small cell carcinoma of ovary.

| Covariate, level         | Crude HR<br>(95% CI) | p-value | Adjusted HR<br>(95% CI) | p-value |
|--------------------------|----------------------|---------|-------------------------|---------|
| <b>Marital status</b>    |                      |         |                         |         |
| Married and other        | 1                    |         |                         |         |
| Single                   | 0.84(0.55 - 1.28)    | 0.425   | 1.23(0.74 - 2.03)       | 0.4257  |
| Unknown                  | 4.82(1.46 - 15.92)   | 0.01    | 2.76(0.68 - 11.19)      | 0.155   |
| <b>Race</b>              |                      |         |                         |         |
| Black                    | 1                    |         |                         |         |
| White                    | 0.95(0.46 - 1.96)    | 0.879   |                         |         |
| Other                    | 0.64(0.24 - 1.7)     | 0.366   |                         |         |
| Unknown                  | 0(0 - Inf)           | 0.996   |                         |         |
| <b>Malignance</b>        |                      |         |                         |         |
| ≥2                       | 1                    |         |                         |         |
| 1                        | 1.72(0.89 - 3.32)    | 0.108   |                         |         |
| <b>Grade</b>             |                      |         |                         |         |
| III                      | 1                    |         |                         |         |
| IV                       | 1.25(0.71 - 2.22)    | 0.445   |                         |         |
| Unknown                  | 1.26(0.71 - 2.23)    | 0.426   |                         |         |
| II                       | 0(0 - Inf)           | 0.995   |                         |         |
| <b>Laterality</b>        |                      |         |                         |         |
| Bilateral                | 1                    |         |                         |         |
| Unilateral               | 0.3(0.19 - 0.47)     | <0.001  | 0.64(0.36 - 1.15)       | 0.1332  |
| <b>Age</b>               |                      |         |                         |         |
| <40                      | 1                    |         | 1                       |         |
| 40-59                    | 0.82(0.48 - 1.41)    | 0.47    | 0.56(0.3 - 1.06)        | 0.0752  |
| ≥60 years                | 2.75(1.71 - 4.43)    | <0.001  | 1.55(0.3 - 1.06)        | 0.2549  |
| <b>Year of diagnosis</b> |                      |         |                         |         |
| 1975-1997                | 1                    |         |                         |         |

|                     |                    |        |                   |        |
|---------------------|--------------------|--------|-------------------|--------|
| 1988-1997           | 0.42(0.19 - 0.94)  | 0.035  | 0.23(0.06 - 0.85) | 0.0273 |
| 1998-2007           | 0.21(0.09 - 0.48)  | <0.001 | 0.10(0.06 - 0.85) | <0.001 |
| 2008-2018           | 0.27(0.12 - 0.59)  | 0.001  | 0.17(0.05 - 0.59) | 0.0055 |
| <b>Size</b>         |                    |        |                   |        |
| 0-5cm               | 1                  |        |                   |        |
| 5-10cm              | 1.92(0.6 - 6.14)   | 0.271  |                   |        |
| 10-15cm             | 2.05(0.69 - 6.03)  | 0.194  |                   |        |
| > 15cm              | 0.86(0.29 - 2.58)  | 0.792  |                   |        |
| Unknown             | 1.78(0.64 - 4.97)  | 0.27   |                   |        |
| <b>FIGO stage</b>   |                    |        |                   |        |
| I                   | 1                  |        |                   |        |
| II                  | 1.93(0.86 - 4.36)  | 0.112  | 1.25(0.55 - 2.88) | 0.5941 |
| III                 | 1.86(0.98 - 3.51)  | 0.056  | 1.66(0.85 - 3.27) | 0.1395 |
| IV                  | 2.89(1.6 - 5.22)   | <0.001 | 1.7(0.78 - 3.71)  | 0.1835 |
| <b>Radiation</b>    |                    |        |                   |        |
| No                  | 1                  |        |                   |        |
| Yes                 | 0.69(0.28 - 1.7)   | 0.419  |                   |        |
| <b>Chemotherapy</b> |                    |        |                   |        |
| No/Unknown          | 1                  |        |                   |        |
| Yes                 | 0.36(0.23 - 0.56)  | <0.001 | 0.25(0.15 - 0.43) | <0.001 |
| <b>Surgery</b>      |                    |        |                   |        |
| No                  | 1                  |        |                   |        |
| Yes                 | 0.27(0.16 - 0.44)  | <0.001 | 0.31(0.16 - 0.63) | 0.0012 |
| Unknown/other       | 6.36(0.81 - 50.17) | 0.079  | 8.7(0.87 - 87.14) | 0.0658 |

**Supplementary Table S3.** Univariable and multivariable Cox regression models for overall survival among patients with non-SCCO and SCCO in unmatched cohort.

| Characteristics          | non-SCCO             |         |                      |         | SCCO                 |                   |                      |         |
|--------------------------|----------------------|---------|----------------------|---------|----------------------|-------------------|----------------------|---------|
|                          | Crude HR<br>(95% CI) | p-value | Adjusted HR (95% CI) | p-value | Crude HR<br>(95% CI) | p-value           | Adjusted HR (95% CI) | p-value |
| <b>Marital status</b>    |                      |         |                      |         |                      |                   |                      |         |
| Married and other        | 1                    |         |                      |         | 1                    |                   |                      |         |
| Single                   | 0.64                 | <0.001  | 1.02(0.98 - 1.06)    | 0.3328  | 1.06(0.63 - 1.77)    | 0.835             |                      |         |
| Unknown                  | 0.82                 | <0.001  | 0.93(0.86 - 1)       | 0.0637  | 5.94(0.77 - 46.16)   | 0.088             |                      |         |
| <b>Race</b>              |                      |         |                      |         |                      |                   |                      |         |
| Black                    | 1                    |         |                      |         | 1                    |                   |                      |         |
| Other                    | 0.69                 | <0.001  | 0.79(0.74 - 0.85)    | <0.001  | 0.77(0.23 - 2.53)    | 0.664             |                      |         |
| Unknown                  | 0.18                 | <0.001  | 0.33(0.19 - 0.56)    | <0.001  |                      |                   |                      |         |
| White                    | 0.96                 | 0.117   | 0.85(0.81 - 0.89)    | <0.001  | 1.11(0.44 - 2.79)    | 0.829             |                      |         |
| <b>Malignance</b>        |                      |         |                      |         |                      |                   |                      |         |
| ≥2                       | 1                    |         |                      |         | 1                    |                   |                      |         |
| 1                        | 1.16                 | <0.001  | 1.13(1.1 - 1.16)     | <0.001  | 2.57(1.02 - 6.48)    | 0.045             | 2.79(1.06 - 7.33)    | 0.0373  |
| <b>Grade</b>             |                      |         |                      |         |                      |                   |                      |         |
| 1                        | 1                    |         |                      |         |                      |                   |                      |         |
| 2                        | 1.88(1.76 - 2)       | <0.001  | 1.34(1.26 - 1.43)    | <0.001  |                      |                   |                      |         |
| 3                        | 3.33(3.15 - 3.53)    | <0.001  | 1.57(1.48 - 1.66)    | <0.001  | 1                    |                   |                      |         |
| 4                        | 3.05(2.86 - 3.24)    | <0.001  | 1.53(1.43 - 1.63)    | <0.001  | 1.03(0.54 - 1.99)    | 0.927             |                      |         |
| Unknown                  | 2.11(1.99 - 2.24)    | <0.001  | 1.39(1.31 - 1.48)    | <0.001  | 1.03(0.54 - 1.99)    | 0.927             |                      |         |
| <b>Laterality</b>        |                      |         |                      |         |                      |                   |                      |         |
| Bilateral                | 1                    |         |                      |         | 1                    |                   |                      |         |
| Unilateral               | 0.46                 | <0.001  | 0.84(0.82 - 0.86)    | <0.001  | 0.34(0.18 - 0.65)    | 0.001             | 0.37(0.16 - 0.86)    | 0.0211  |
| <b>Age</b>               |                      |         |                      |         |                      |                   |                      |         |
| <40                      | 1                    |         |                      |         | 1                    |                   |                      |         |
| ≥60                      | 6.06(5.67 - 6.48)    | <0.001  | 3.79(3.53 - 4.07)    | <0.001  | 1.07(0.48 - 2.38)    | 0.878             |                      |         |
| 40-59                    | 2.94(2.75 - 3.15)    | <0.001  | 2.24(2.09 - 2.41)    | <0.001  | 0.55(0.28 - 1.08)    | 0.081             |                      |         |
| <b>Year of diagnosis</b> |                      |         |                      |         |                      |                   |                      |         |
| 1988-1997                | 1                    |         |                      |         | 1                    |                   |                      |         |
| 1998-2007                | 0.86                 | <0.001  | 0.89(0.86 - 0.93)    | <0.001  | Year21998-2008       | 0.3(0.16 - 0.58)  | 0.59(0.18 - 1.95)    | 0.3908  |
| 2008-2018                | 0.71                 | <0.001  | 0.79(0.75 - 0.82)    | <0.001  | Year22008-2018       | 0.49(0.26 - 0.92) | 1.38(0.39 - 4.92)    | 0.617   |
| <b>Size</b>              |                      |         |                      |         |                      |                   |                      |         |
| 0-5cm                    | 1                    |         |                      |         | 1                    |                   |                      |         |
| 5-10cm                   | 1.07                 | 0.004   | 0.97(0.93 - 1.01)    | 0.1724  | 2.47(0.51 - 12)      | 0.261             |                      |         |
| 10-15cm                  | 0.88                 | <0.001  | 0.95(0.9 - 1)        | 0.0361  | 3.16(0.71 - 14.01)   | 0.131             |                      |         |

|                     |                   |        |                   |        |                    |       |                   |        |
|---------------------|-------------------|--------|-------------------|--------|--------------------|-------|-------------------|--------|
| >15cm               | 0.75              | <0.001 | 0.99(0.93 - 1.05) | 0.7053 | 1.43(0.32 - 6.28)  | 0.638 |                   |        |
| Unknown             | 1.37              | <0.001 | 1.08(1.04 - 1.12) | 0.0001 | 3.27(0.75 - 14.24) | 0.115 |                   |        |
| No/Micro            | 0.39              | <0.001 | 0.89(0.65 - 1.22) | 0.4842 |                    |       |                   |        |
| <b>FIGO stage</b>   |                   |        |                   |        |                    |       |                   |        |
| I                   | 1                 |        |                   |        | 1                  |       |                   |        |
| II                  | 2.08(1.97 - 2.19) | <0.001 | 1.87(1.77 - 1.97) | <0.001 | 1.77(0.76 - 4.13)  | 0.187 | 1.21(0.51 - 2.88) | 0.6632 |
| III                 | 4.5(4.34 - 4.67)  | <0.001 | 3.53(3.38 - 3.69) | <0.001 | 1.68(0.86 - 3.27)  | 0.126 | 1.35(0.66 - 2.76) | 0.406  |
| IV                  | 6.73(6.47 - 7)    | <0.001 | 4.64(4.43 - 4.86) | <0.001 | 2.26(1.13 - 4.49)  | 0.02  | 1.24(0.55 - 2.8)  | 0.6095 |
| <b>Radiation</b>    |                   |        |                   |        |                    |       |                   |        |
| No                  | 1                 |        |                   |        |                    |       |                   |        |
| Yes                 | 0.93              | 0.094  |                   |        | 0.34(0.05 - 2.49)  | 0.291 |                   |        |
| <b>Chemotherapy</b> |                   |        |                   |        |                    |       |                   |        |
| No                  | 1                 |        |                   |        | 1                  |       |                   |        |
| Yes                 | 1.46(1.42 - 1.5)  | <0.001 | 0.77(0.74 - 0.79) | <0.001 | 0.56(0.32 - 0.98)  | 0.042 | 0.65(0.34 - 1.27) | 0.2088 |
| <b>Surgery</b>      |                   |        |                   |        |                    |       |                   |        |
| DEB/EXE             | 1                 |        |                   |        | 1                  |       |                   |        |
| Non-DEB             | 0.49              | <0.001 | 0.93(0.9 - 0.97)  | 0.0013 | 0.78(0.29 - 2.14)  | 0.632 | 1.67(0.51 - 5.52) | 0.3973 |
| Unknown             | 0.48              | <0.001 | NA                |        | 0.31(0.12 - 0.81)  | 0.017 | NA                |        |
| <b>LND</b>          |                   |        |                   |        |                    |       |                   |        |
| No                  | 1                 |        |                   |        | 1                  |       |                   |        |
| Yes                 | 0.54              | <0.001 | 0.7(0.69 - 0.72)  | <0.001 | 0.42(0.25 - 0.71)  | 0.001 | 0.49(0.25 - 0.97) | 0.0403 |

No/Micro: no mass; no tumor found/microscopic focus or foci only; DEB/EXE: debulking surgery/pelvic exenteration; Non-DEB: non-debulking surgery; LND: lymph node dissection.
